# Supplementary material for: TMEM135 regulates primary ciliogenesis through modulation of intracellular cholesterol distribution
Source: EMBO Rep. 2020 Mar 11;21(5):e48901. doi: 10.15252/embr.201948901 (PMC7202201; doi:10.15252/embr.201948901)
Supplement: Supplementary file 1 — Appendix [file EMBR-21-e48901-s001.pdf]

## **Appendix**

Yunash Maharjan<sup>1</sup>, Joon No Lee<sup>1</sup>, SeongAe Kwak<sup>2</sup>, Raghendra Kumar Dutta<sup>1</sup>, Channy Park<sup>1</sup>, Seong-Kyu Choe<sup>2</sup>, and Raekil Park<sup>1#</sup>

### **TMEM135 regulates primary ciliogenesis through modulation of intracellular cholesterol distribution**

#### **Table of content**

- 1. Appendix Figure S1: TMEM15 localizes to peroxisomes.**
- 2. Appendix Figure S2: TMEM135 depletion is not associated with impaired peroxisomal matrix protein import or accumulation of VLCFA.**
- 3. Appendix Figure S3: TMEM135 siRNA efficiently depletes TMEM135 fluorescent signal from peroxisomes.**
- 4. Appendix Figure S4: Endogenous Rab8 localizes to primary cilium in a small cell population.**
- 5. Appendix Figure S5: TMEM135 depletion mediated impaired Rab8 activation is not associated with Rabin8 dysfunction.**
- 6. Appendix Figure S6: TMEM135 depletion increases peroxisome-Rab8 overlap.**
- 7. Appendix Figure S7: TMEM135 depletion does not affect IFT88 trafficking to centrioles.**
- 8. Appendix Table S1: List of siRNA sequences used in this study.**
- 9. Appendix Table S2: List of antibodies used in this study.**
- 10. Appendix Table S3: List of primer sequence used for RT-qPCR.**
- 11. References**

## Appendix Figure S1

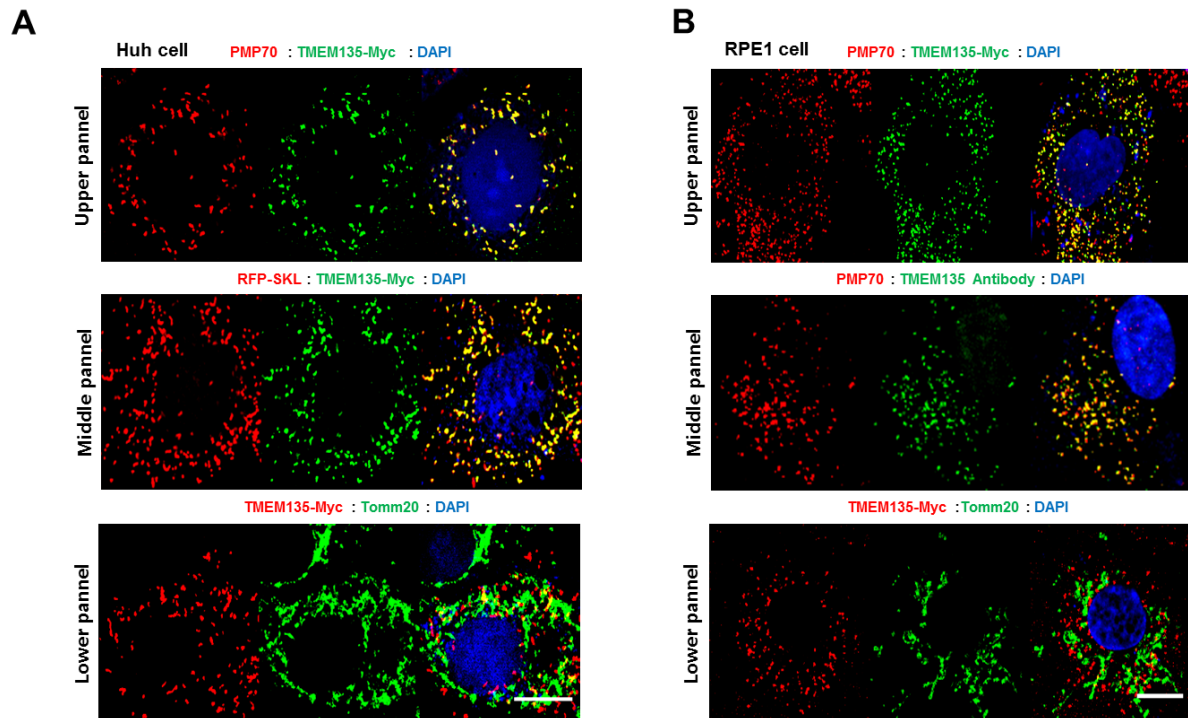

### Appendix Figure S1. TMEM135 localizes to peroxisomes.

(A) Huh7 cells were transfected with TMEM135-myc plasmid (Upper and lower panel), followed by immunostaining with antibodies against PMP70 (red) and Myc (green) in the upper panel, Myc (red) and Tomm20 (green) in lower panel. Scale bar, 10  $\mu$ m. Cells were co-transfected with TMEM135-Myc and RFP-SKL plasmid (middle panel).

(B) RPE1 cells were transfected with TMEM135-Myc plasmids (Upper panel and lower panel) and immunostained with antibodies against PMP70 (red) and Myc (green) in Upper panel and Myc (red) and Tomm20 (green) in lower panel. Scale bar, 10  $\mu$ m. Endogenous TMEM135 and PMP70 was stained by TMEM135 antibody (green) and PMP70 antibody (red) middle panel. Scale bar, 10  $\mu$ m.

## Appendix Figure S2

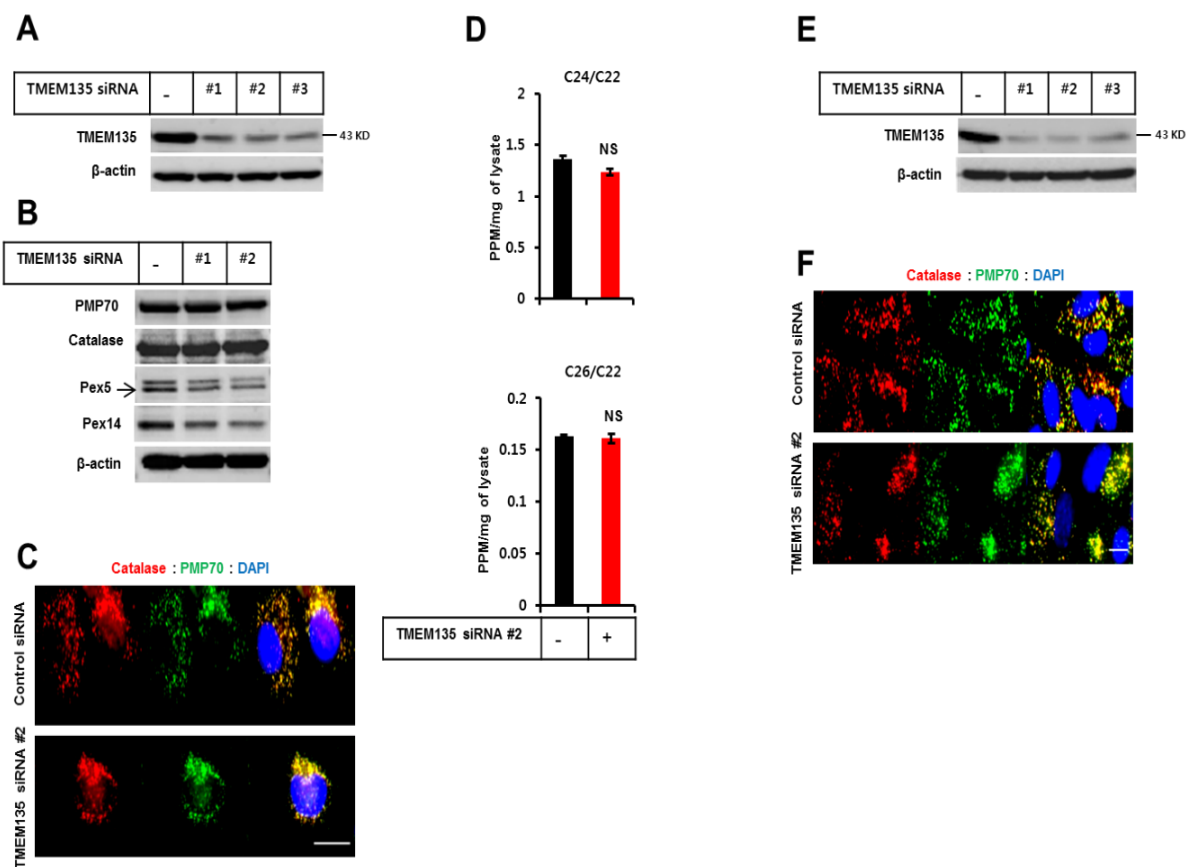

### Appendix Figure S2. TMEM135 depletion is not associated with impaired peroxisomal matrix protein import or accumulation of VLCFA.

(A) Huh7 cells were transfected with siRNAs as indicated followed by Western blot analysis for TMEM135 knock down efficiency by using TMEM135 antibody.

(B) Huh cells were transfected with siRNAs as indicated followed by Western blot analysis of different peroxisome protein (PMP70, catalase, Pex5, Pex14).

(C) Huh cells were transfected with siRNAs as indicated and immunostained with antibodies against catalase (red) and PMP70 (green). Scale bar, 10  $\mu$ m.

(D) Huh7 cells were transfected with siRNAs as indicated followed by GC-MS analysis of VLCFA. Data represent mean  $\pm$  SD (n = 3 experiments). NS, not significant. Student's T-test.

(E) RPE1 cells were transfected with siRNAs as indicated followed by Western blot analysis for TMEM135 antibody.

(F) RPE1 cells were transfected with siRNAs as indicated and immunostained with antibodies against catalase (red) and PMP70 (green). Scale bar, 10  $\mu$ m.

### Appendix Figure S3

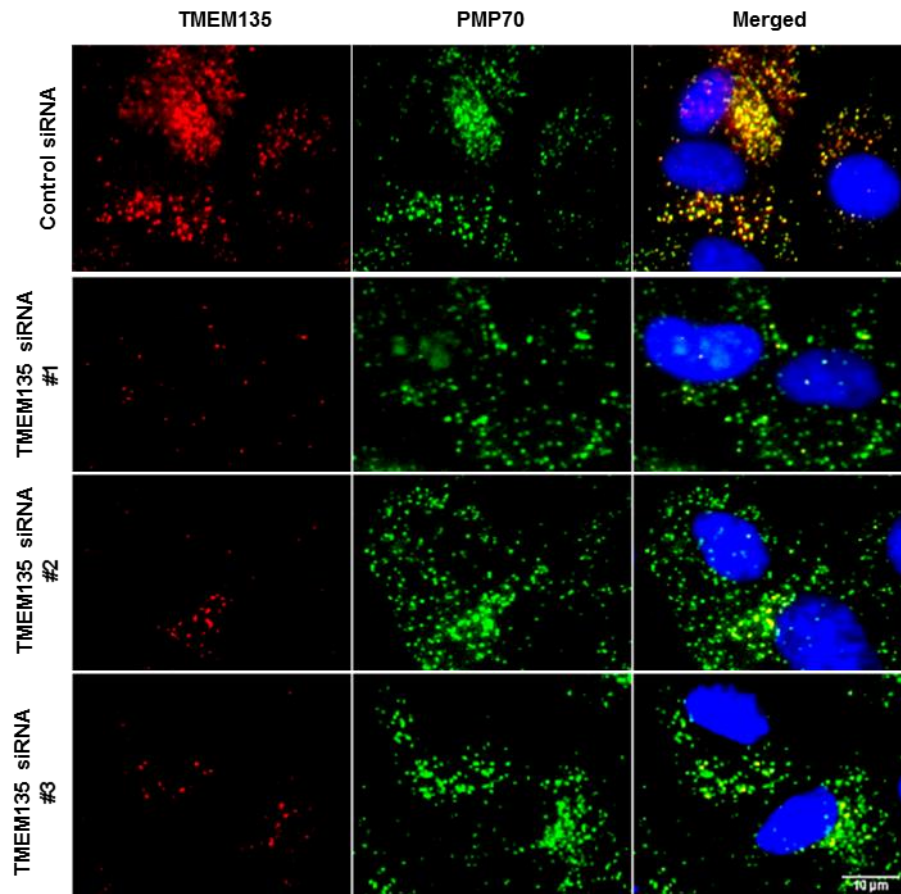

**Appendix Figure S3: TMEM135 siRNA efficiently reduces TMEM135 fluorescent signal from peroxisomes.** Representative image showing that all three siRNA efficiently reduces TMEM135 protein from peroxisomes stained with PMP70 in RPE1 cell. Scale bar, 10  $\mu$ m.

#### Appendix Figure S4

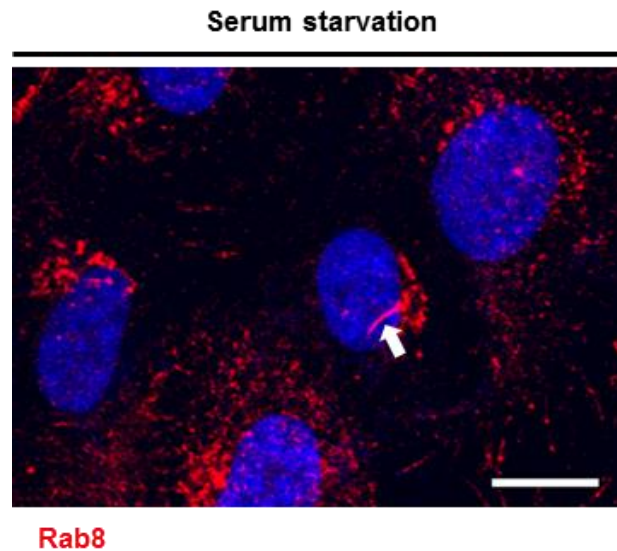

#### Appendix Figure S4. Few cells were detected with ciliary endogenous ciliary Rab8.

RPE1 cells were serum-starved for 24 h and immunostained with Rab8 antibody. Representative image showing ciliary Rab8. Scale bar, 10  $\mu$ m. Arrow indicate the endogenous Rab8 localizes in few cell populations during serum-starvation.

## Appendix Figure S5

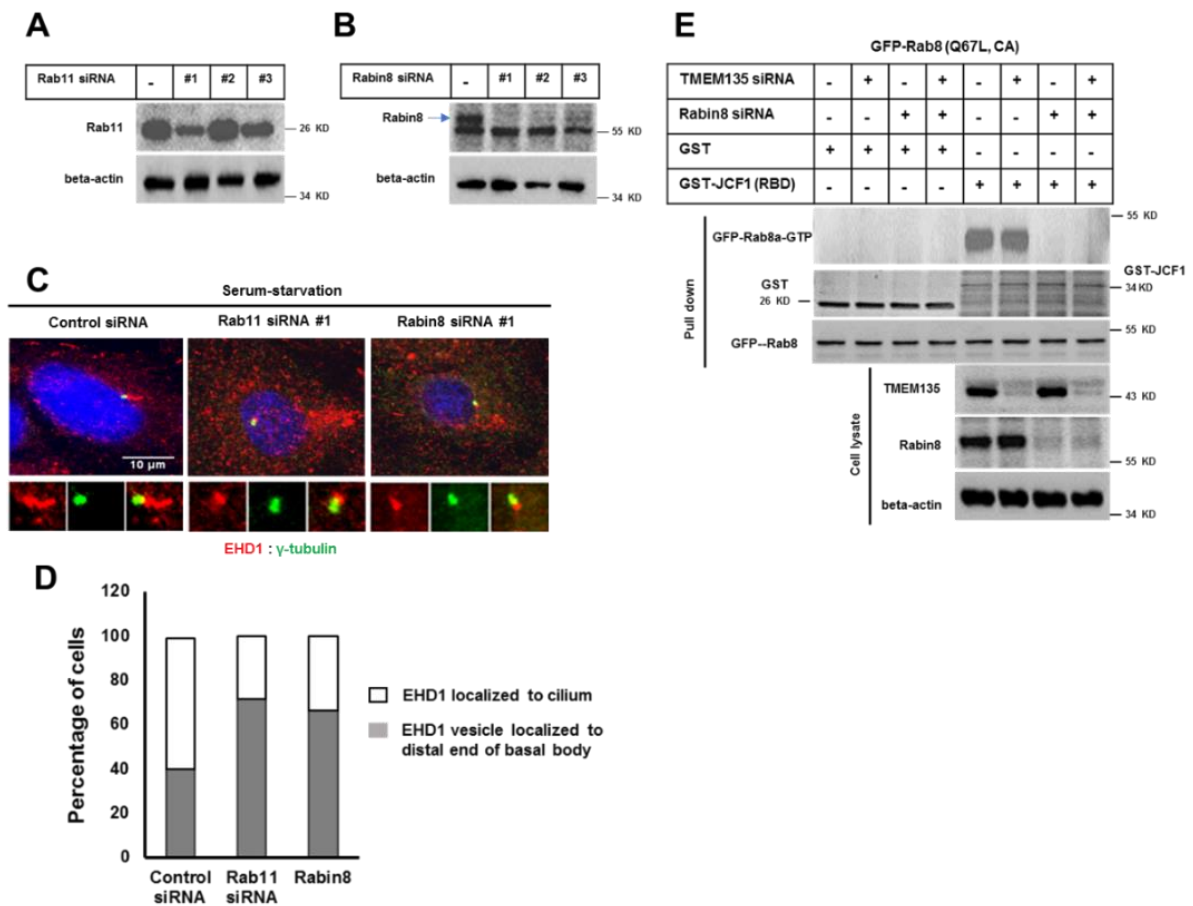

**Appendix Figure S5. TMEM135 depletion mediated impaired Rab8 activation is not associated with Rabin8 dysfunction.**

(A, B) RPE1 cells were transfected with siRNAs as indicated followed by Western blot analysis for Rab11 and Rabin8 knockdown efficiency respectively.

(C) RPE1 cells were transfected with siRNAs as indicated followed methanol fixation and immunostaining with EHD1 (red) and  $\gamma$ -tubulin (green) antibody. Scale bar, 10  $\mu$ m.

(D) Quantitative data of (C) showing percentage of cells with EHD1 localization in the cilium or basal body. Data represents average (n=2 experiments), 100 cells were scored per condition per experiment.

(E) Cells were transfected as shown and the cell lysates were incubated with purified GST-JCF1 (RBD) fusion protein. The amount of GTP-Rab8 bound to GST-JCF1(RBD) was analyzed by Western blot with Rab8 antibody.

## Appendix Figure S6

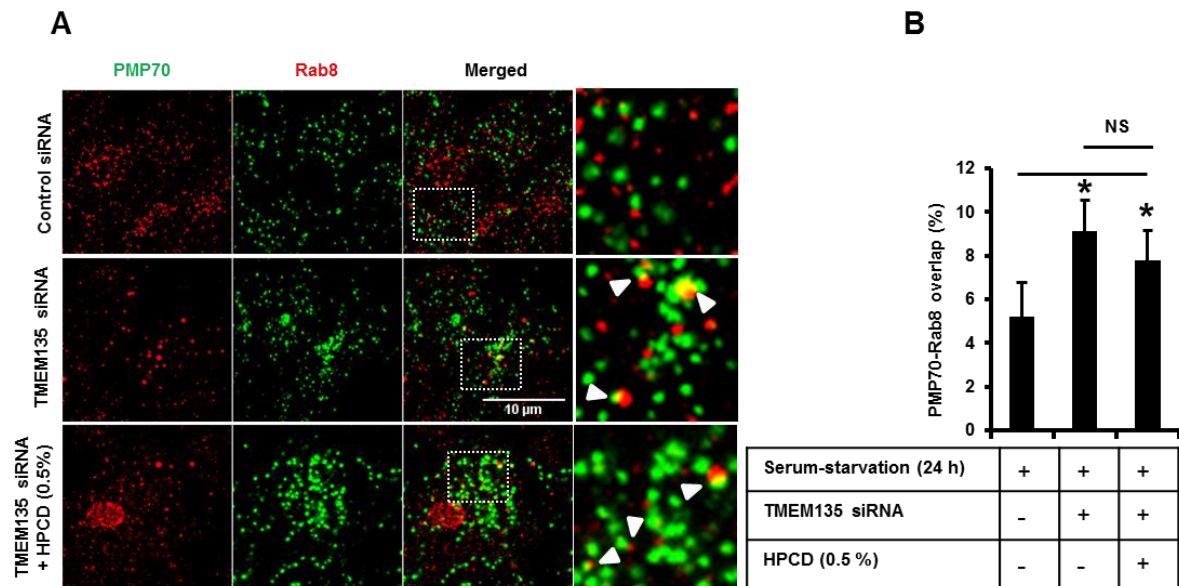

### Appendix Figure S6. TMEM135 depletion increases peroxisome-Rab8 overlap.

(A) RPE1 cells were transfected with siRNAs as indicated for 48 h, incubated with/without HPβCD in serum starved media for additional 18 h, and immunostained with antibodies against Rab8 (red) and PMP70 (green). Scale bar, 10 μm.

(B) Quantification of peroxisome-Rab8 overlap in (A) Data represent mean ± SD (n = 3 experiments). 50 cells were scored per condition per experiment). \*P < 0.05, Student's t-test.

## Appendix Figure S7

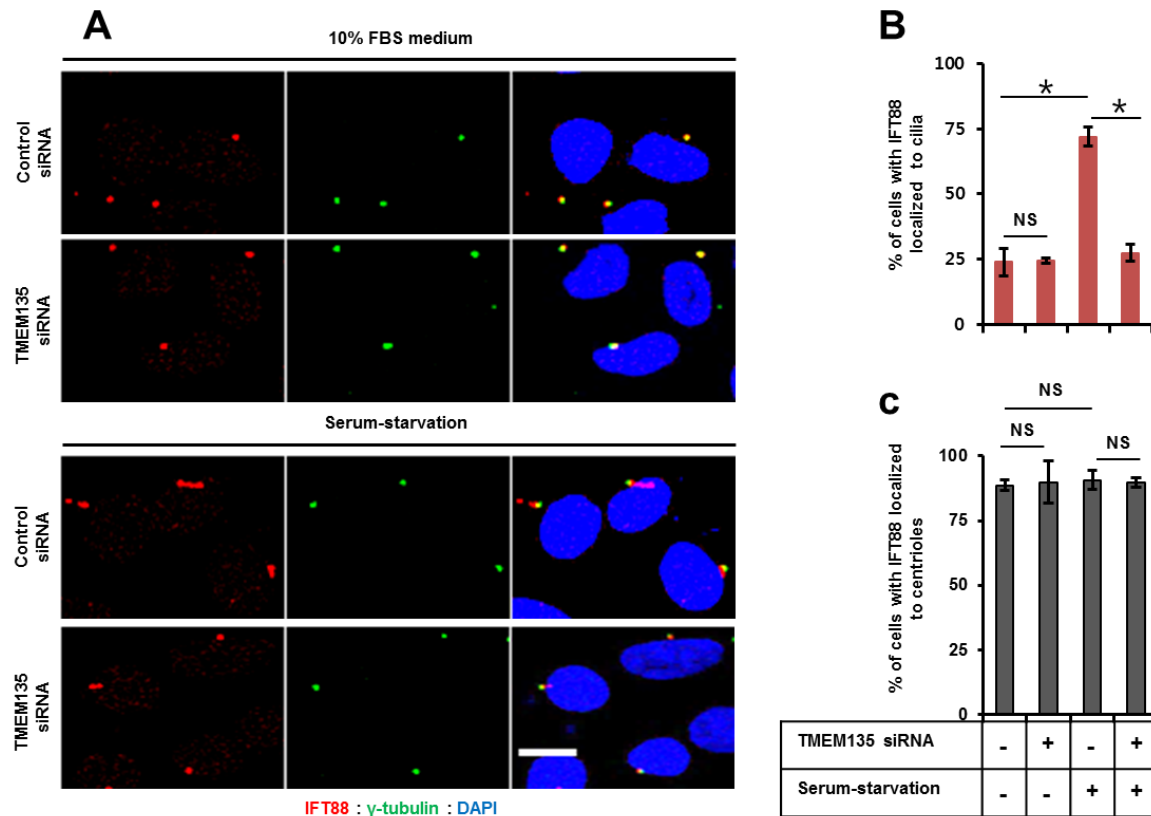

### Appendix Figure S7. TMEM135 depletion does not affect IFT88 trafficking to centrioles.

(A) RPE1 cells were transfected with siRNAs as indicated and immunostained with antibodies against IFT88 (red) and  $\gamma$ -tubulin (green). Scale bar, 10  $\mu$ m.

(B) Quantification of percentage of cells with IFT88 localized to cilium in (A) Data represent mean  $\pm$  SD (n = 3 experiments). 100 cells were scored per condition per experiment \*P < 0.05, Student's t-test.

(C) Quantification of percentage of cells with IFT88 localized to centrioles in (A) Data represent mean  $\pm$  SD (n = 3 experiments). 100 cells were scored per condition per experiment.

NS, not significant, Student's t-test

**Appendix Table S1: List of siRNA sequences used in this study**

| siRNA       | Sense strand sequence      | Reference |
|-------------|----------------------------|-----------|
| TMEM135 (1) | 5'-GCUCAAUUUAUGCAGUAGA-3'  | Bioneer   |
| TMEM135 (2) | 5'-AGUUCAGGACAGCUGUGAU-3'  | Bioneer   |
| TMEM135 (3) | 5'-CUGCAUUUAGGCAUCUGUU-3'  | Bioneer   |
| IFT20       | 5'-GUAAAGUAGAAGCAGAACA-3'  | Bioneer   |
| Rab8a       | 5'-GUAGUGCCAUGAAGCGAUU-3'  | Bioneer   |
| Rab8b       | 5'-CUGUCAUGUUCACUCUGAA-3'  | Bioneer   |
| Rab11a (1)  | 5'-CGAGCUAUAAACAUCAGCAU-3' | Bioneer   |
| Rabin8 (1)  | 5'-GUCAUCAGGACCUCAGUGU-3'  | Bioneer   |

**Appendix Table S2: List of antibodies used in this study**

| Antibody                               | Application | Dilution         | Source | Reference                            |
|----------------------------------------|-------------|------------------|--------|--------------------------------------|
| c-Myc                                  | IF          | 1:1000           | Mouse  | sc-40, Santa Cruz Biotech            |
| c-Myc                                  | IF          | 1:1000           | Rabbit | A190-205A, Bethyl                    |
| PMP70                                  | IF and WB   | 1:500            | Rabbit | ab3421, Abcam                        |
| PMP70                                  | IF          | 1:500            | Mouse  | SAB4200181, Sigma                    |
| Tomm20                                 | IF          | 1:500            | Mouse  | sc-17764, Santa Cruz Biotech         |
| SREBP2                                 | WB          | 1:1000           | Rabbit | Lee JN, et al. (2004)                |
| UBXD8                                  | WB          | 1:2000           | Rabbit | Lee JN, et al. (2010)                |
| CREB                                   | WB          | 1:2000           | Rabbit | #9192, Cell Signaling                |
| CP110                                  | IF          | 1:500            | Rabbit | 12780-I-AP, Proteintech              |
| IFT20                                  | IF, and WB  | 1:500            | Rabbit | 13615-I-AP, Proteintech              |
| IFT88                                  | IF          | 1:500            | Rabbit | 13967-I-AP, Proteintech              |
| Rab8a                                  | IF and WB   | 1:500 and 1:2000 | Rabbit | ab188574, Abcam                      |
| ARL13B                                 | IF          | 1:500            | Rabbit | 17711-I-AP, Proteintech              |
| Acetelated-tubulin                     | IF          | 1:1000           | Mouse  | T7451, Sigma                         |
| $\gamma$ -tubulin                      | IF          | 1:500            | Mouse  | T5326, Sigma                         |
| GM130                                  | WB          | 1:1000           | Mouse  | 610822, BD Transduction Laboratories |
| Rab11                                  | IF          | 1:200 and 1:2000 | Mouse  | 610656, BD Transduction Laboratories |
| GFP (B-2) antibody                     | WB          | 1:1000           | Mouse  | SC-9996, Santa Cruz Biotech          |
| Rabin8                                 | IF          | 1:500            | Rabbit | 12321-I-AP, Proteintech              |
| TCTN1                                  | IF          | 1:500            | Rabbit | 15004-I-AP, Proteintech              |
| TMEM135                                | IF and WB   | 1:500 and 1:1000 | Rabbit | SAB3500832, Sigma                    |
| TMEM135                                | IF and WB   | 1:500 and 1:1000 | Rabbit | Ab222237, Abcam                      |
| LAMP1                                  | IF and WB   | 1:500 and 1:1000 | Mouse  | sc-2011, Santa Cruz Biotech          |
| Catalase                               | IF and WB   | 1:500 and 1:2000 | Rabbit | Ab4877, Abcam                        |
| Pex5                                   | WB          | 1:2000           | Rabbit | GTX109798                            |
| Pex14                                  | WB          | 1:1000           | Rabbit | A303-0858, Bethyl                    |
| EEA1                                   | WB          | 1:1000           | Rabbit | C45B10, Cell signalling              |
| Na <sup>+</sup> /K <sup>+</sup> ATPase | WB          | 1:2000           | Rabbit | Sc-21712, Santa Cruz Biotech         |
| EHD1                                   | IF          | 1:250            | Rabbit | HPA067747, ATLAS ANTIBODIES          |

**Appendix Table S3: List of primer sequence used for RT-QPCR**

| Gene             | Primer sequence                     | Reference |
|------------------|-------------------------------------|-----------|
| TMEM135          | F: 5'-CCAGCTTGGAGCTTTTCTTG-3'       | Bioneer   |
|                  | R: 5'-AGTTCATCATCTAAGTTTCTGATCCA-3' |           |
| HMGCoA synthase  | F: 5'-GACTTGTGCATTCAAACATAGCAA-3'   | Bioneer   |
|                  | R: 5'-GCTGTAGCAGGGAGTCTTGGTACT-3'   |           |
| HMGCoA reductase | F: 5'-CAAGGAGCATGCAAAGATAATCC-3'    | Bioneer   |
|                  | R: 5'-GCCATTACGGTCCCACAC-3'         |           |
| LDLR             | F: 5'-GGCTGCGTTAATGTGACACTCT-3'     | Bioneer   |
|                  | R: 5'-CTCTAGCCATGTTGCAGACCTTGT-3'   |           |
| Insig1           | F: 5'-CCCAGATTTCTCTATATTCGTTCTT-3'  | Bioneer   |
|                  | R: 5'-CACCCATAGCTAACTGTCGTCCTA-3'   |           |
| Rab8a            | F: 5'-GCCTACTACAGGGGTGCAAT-3'       | Bioneer   |
|                  | R: 5'-GGATGTTGTCGAAGGACTTC-3'       |           |
| Rab8b            | F: 5'-ACGAGATATAATGACAAAAC-3'       | Bioneer   |
|                  | R: 5'-GATCGGTTTTCTGTTATTT-3'        |           |

## References

Lee, J.N., and Ye, J. (2004). Proteolytic activation of sterol regulatory element-binding protein induced by cellular stress through depletion of Insig-1. *J Biol Chem.* **279**, 45257-65.

Lee, J. N., Kim, H., Yao, H., Chen, Y., Weng, K., Ye, J. (2010). Identification of Ubx8 protein as a sensor for unsaturated fatty acids and regulator of triglyceride synthesis. *Proc Natl Acad Sci USA.* **107**, 21424-9.
