# Supplementary material for: TMEM135 regulates primary ciliogenesis through modulation of intracellular cholesterol distribution
Source: EMBO Rep. 2020 Mar 11;21(5):e48901. doi: 10.15252/embr.201948901 (PMC7202201; doi:10.15252/embr.201948901)
Supplement: Supplementary file 2 — Expanded View Figures PDF [file EMBR-21-e48901-s002.pdf]

## Expanded View Figures

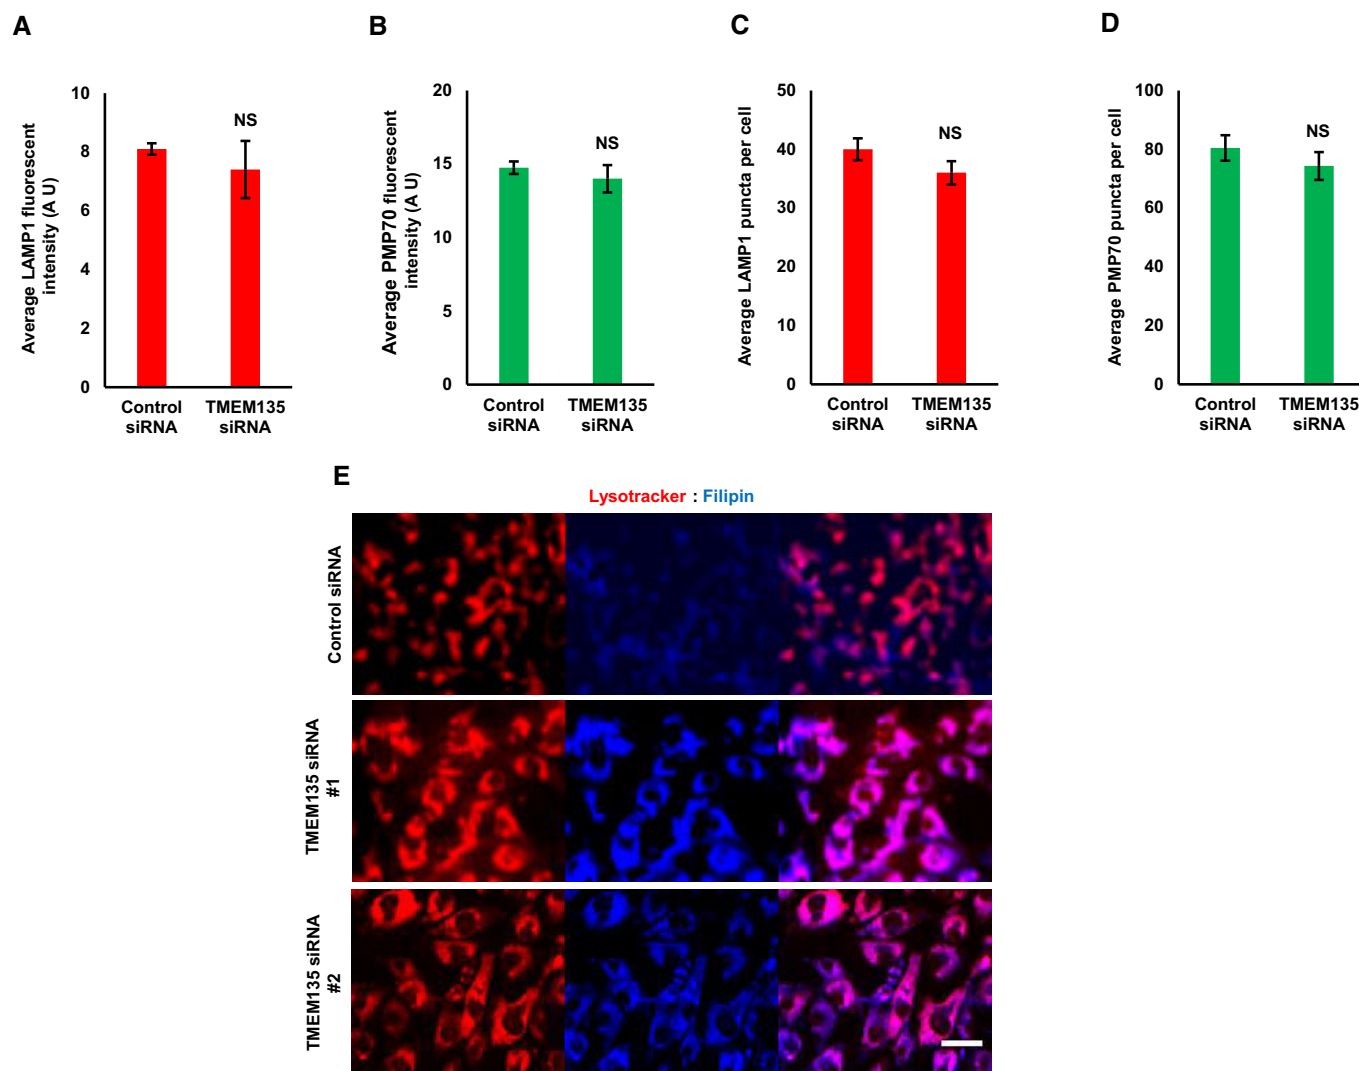

**Figure EV1. TMEM135 depletion results in lysosomal cholesterol accumulation without affecting peroxisome and lysosome abundance.**

A–D RPE1 cells were transfected with either scramble or TMEM135 siRNAs and immunostained for LAMP1 as a lysosome marker (red) and PMP70 as a peroxisome marker (green). (A, B) Fluorescent intensity of lysosome and peroxisome, respectively, within an area of cell was separately measured by ImageJ software. A. U means arbitrary unit. Data represent mean  $\pm$  SD ( $n = 3$  experiments), and 50 cells were scored per condition per experiment. NS, not significant;  $P > 0.05$ , Student's  $t$ -test. (C, D) Lysosome and peroxisome puncta were determined within an area of cell. Data represent mean  $\pm$  SD ( $n = 3$  experiments), and 50 cells were scored per condition per experiment. NS, not significant;  $P > 0.05$ , Student's  $t$ -test.

E RPE1 cells were transfected with siRNAs, followed by sequential staining with lysotracker (red) and filipin (blue). Scale bar, 20  $\mu$ m.

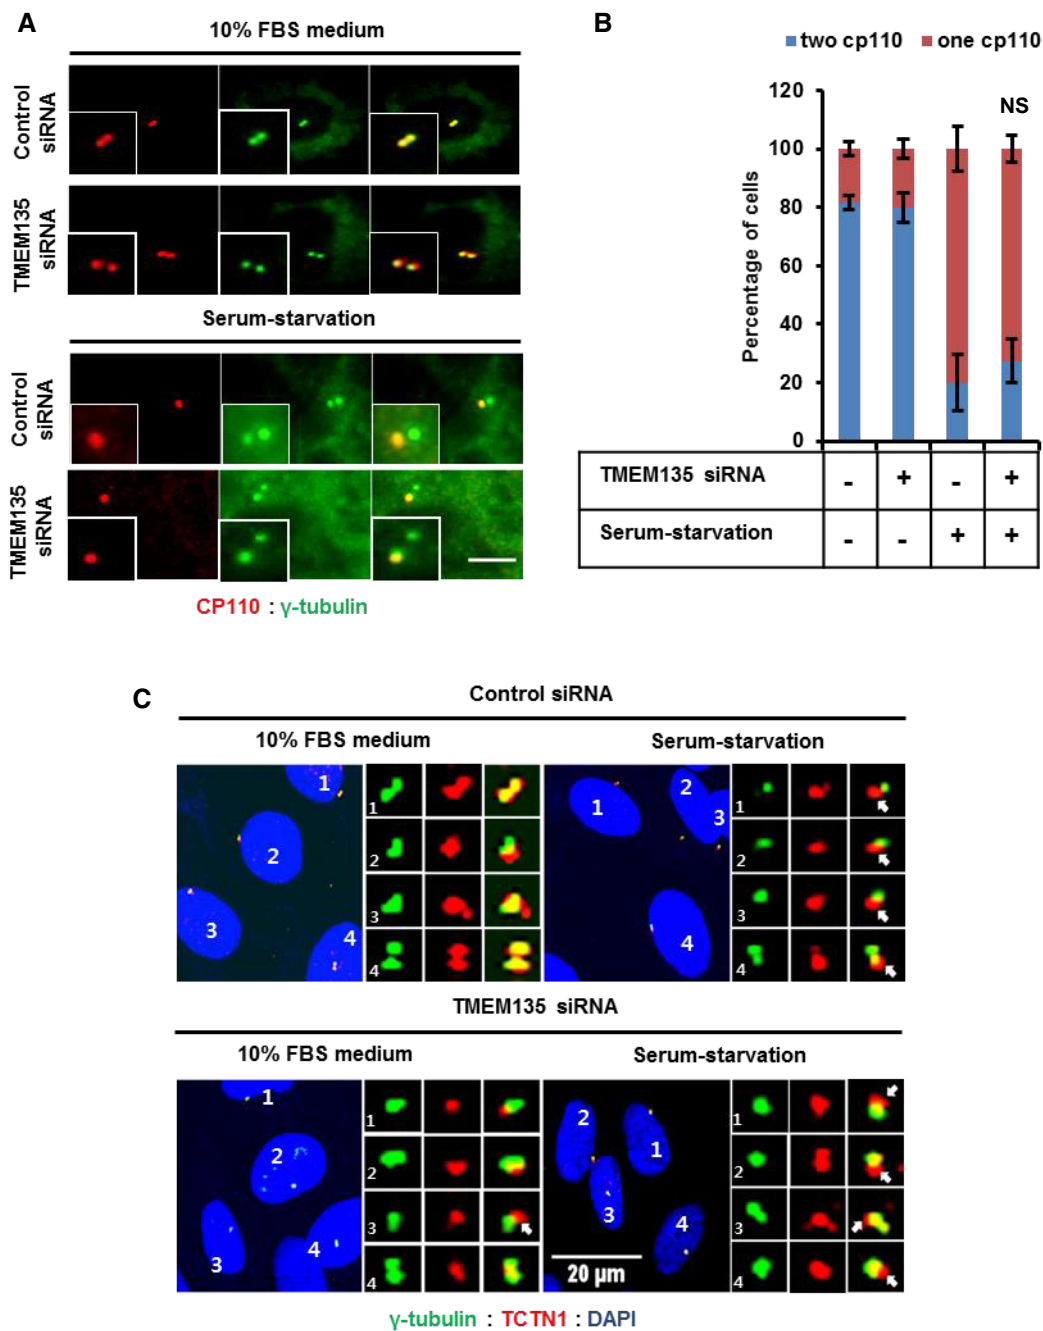

**Figure EV2. Basal body uncapping, and transition zone formation is unaffected by TMEM135 depletion.**

A RPE1 cells were transfected with siRNAs as indicated and immunostained with antibodies against CP110 (red) and  $\gamma$ -tubulin (green). Scale bar, 10  $\mu$ m.

B Quantification of percentage of cells with one or two CP110. Data represent mean  $\pm$  SD ( $n = 3$  experiments), and 200 cells were scored per condition per experiment. NS, not significant;  $P > 0.05$ , Student's  $t$ -test.

C Cells were transfected with siRNAs as indicated and immunostained with antibodies against TCTN1 (red) and  $\gamma$ -tubulin (green). Scale bar, 20  $\mu$ m.

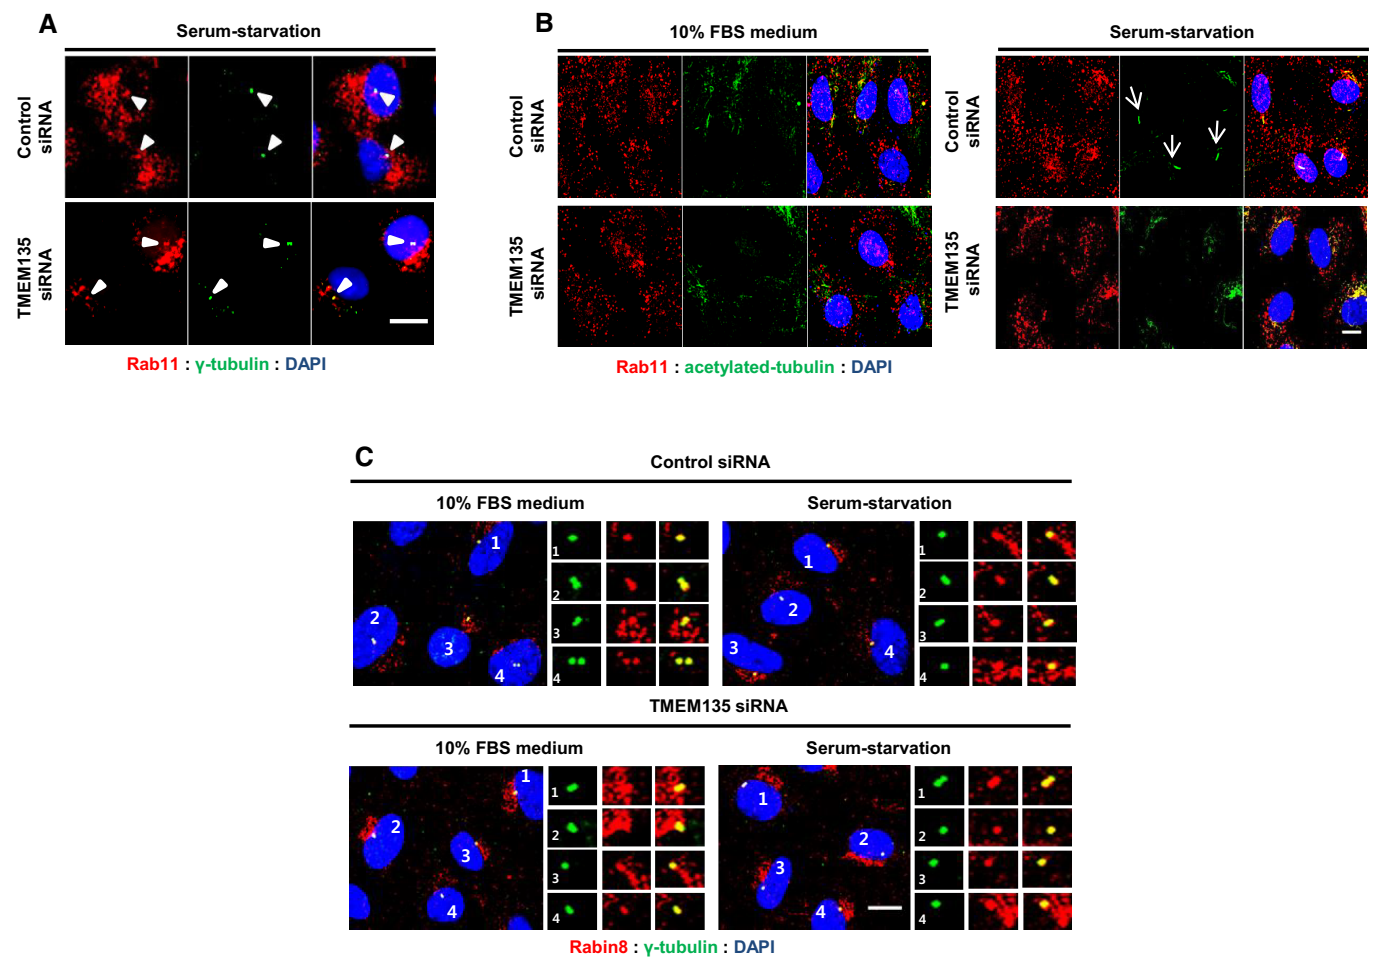

**Figure EV3. Impaired ciliogenesis observed in TMEM135-depleted cells is not associated with Rab11 and Rabin8 localization to centrosomes.**

- A RPE1 cells were transfected with siRNAs as indicated and immunostained with antibodies against Rab11 (red) and  $\gamma$ -tubulin (green). Scale bar, 10  $\mu$ m. Arrowheads showing Rab11 localized to centrosomes.
- B Cells were transfected with siRNAs as indicated and immunostained with antibodies against Rab11 (red) and acetylated tubulin (green). Scale bar, 10  $\mu$ m. Arrows showing primary cilium in the serum-starved control cells.
- C RPE1 cells were transfected by siRNAs as indicated and immunostained with antibodies against Rabin8 (red) and  $\gamma$ -tubulin (green). Scale bar, 10  $\mu$ m.

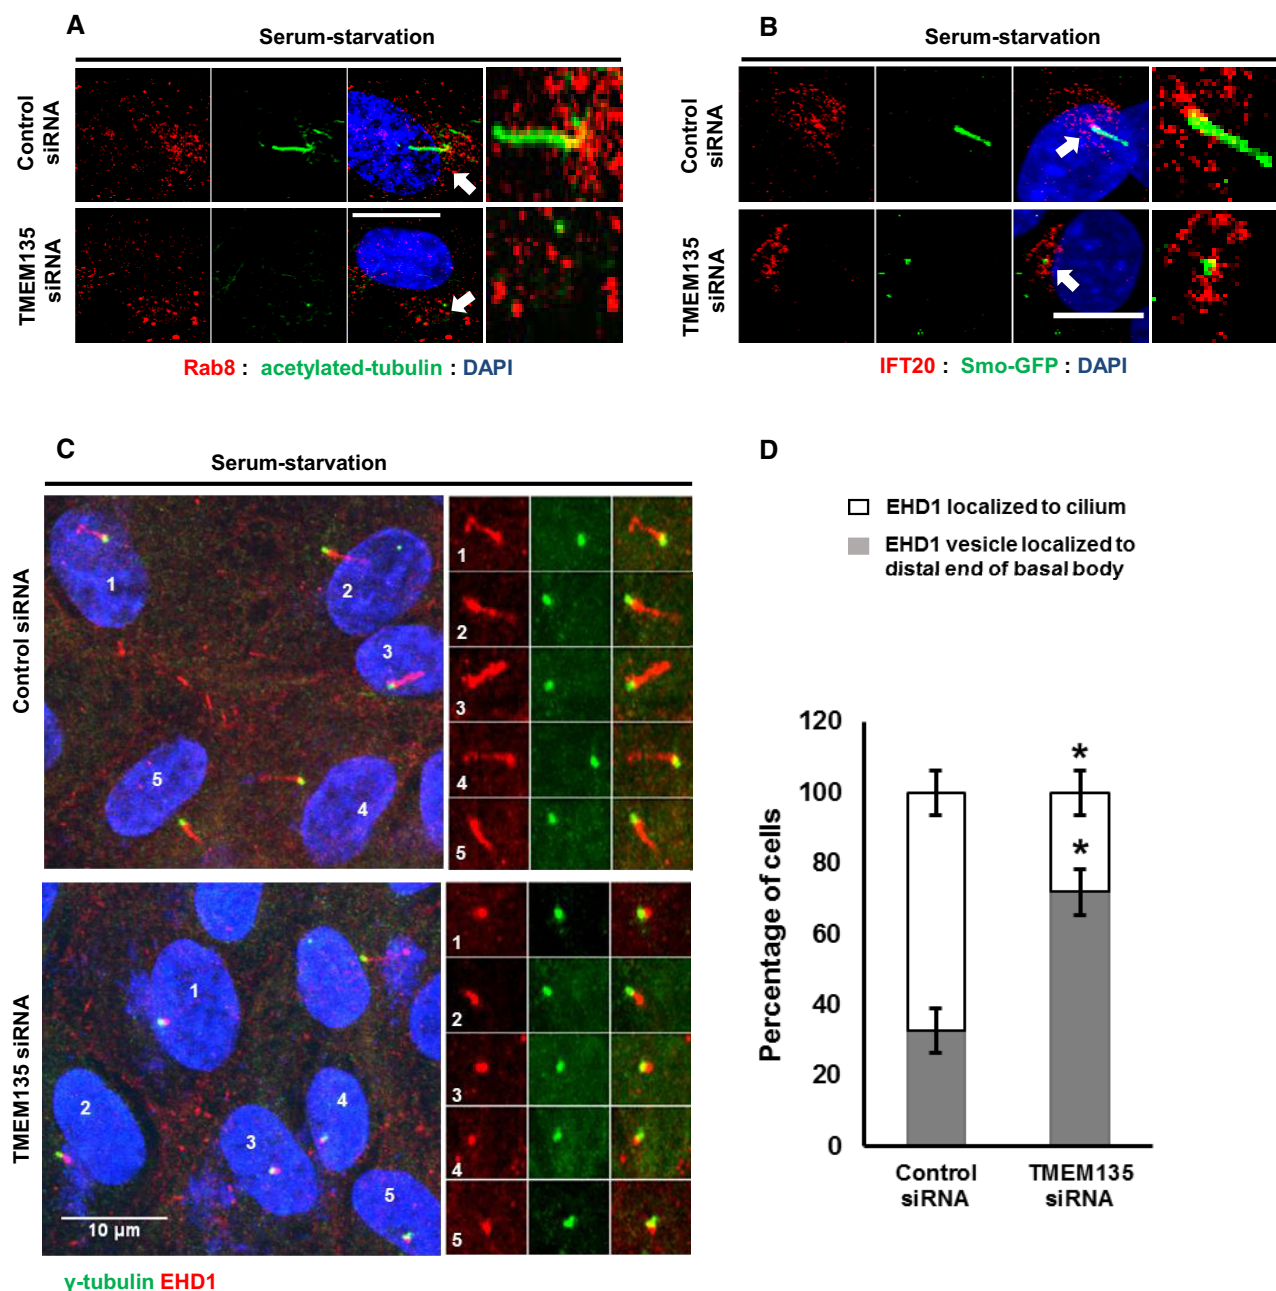

**Figure EV4. TMEM135 depletion does not affect ciliary vesicle formation.**

- A RPE1 cells were transfected with siRNAs as indicated and immunostained with antibodies against Rab8 (red) and acetylated tubulin (green). Scale bar, 10  $\mu$ m. Arrow showing Rab8 accumulation near the base of the primary cilium in control cells.
- B SMO-GFP RPE1 cells were transfected with siRNAs as indicated and immunostained with antibodies against IFT20. Representative confocal images of IFT20 (red) and SMO (green) are shown. Scale bar, 10  $\mu$ m. Arrow showing the centriolar IFT20 localized at the base of the primary cilium or ciliary vesicle in control and TMEM135-depleted cells, respectively.
- C Cells were transfected with siRNAs as indicated and immunostained with antibodies against EHD1 (red) and  $\gamma$ -tubulin (green). Scale bar, 10  $\mu$ m.
- D Quantification of the percentage of cells with EHD1 localized in cilium or at distal end of the basal body (ciliary vesicle). Data represent mean  $\pm$  SD ( $n = 3$  experiments), and 200 cells were scored per condition per experiment, \* $P < 0.05$ , Student's  $t$ -test.

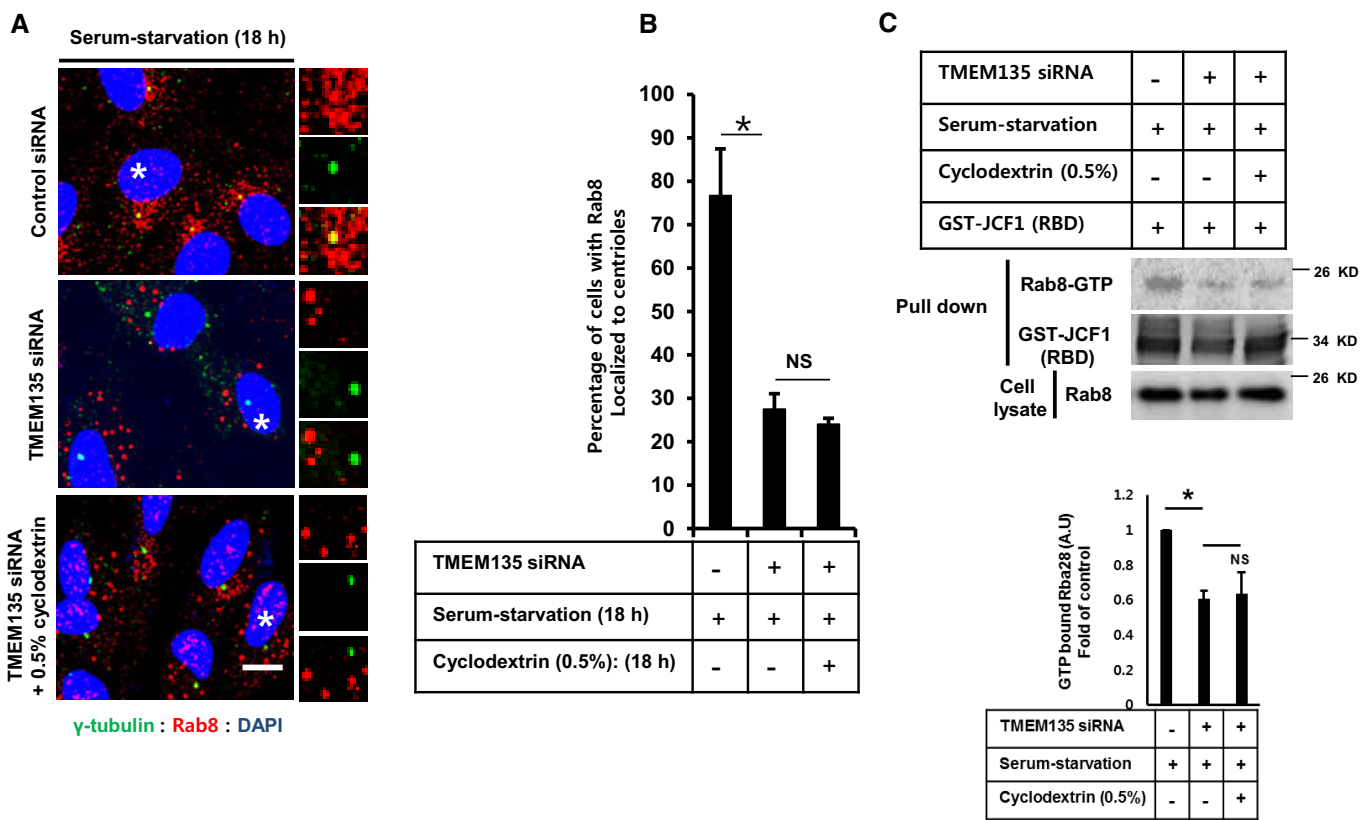

**Figure EV5. Removal of cholesterol from lysosomal compartment does not recover impaired Rab8 trafficking and its activation in TMEM135-depleted cells.**

**A** RPE1 cells were transfected with siRNAs as indicated and immunostained with antibodies against Rab8 (red) and  $\gamma$ -tubulin (green). Scale bar, 10  $\mu$ m. Representative magnified images are shown from cells labeled with white asterisks.

**B** Quantification of the percentage of cells with Rab8 localized at the centrioles. Data represent mean  $\pm$  SD ( $n = 3$  experiments), and 200 cells were scored per condition per experiment;  $*P < 0.05$ , Student's  $t$ -test.

**C** (Upper panel) Cells were transfected as indicated, and cell lysate was incubated with purified GST-JCF1 (RBD) fusion protein. The amount of GTP-Rab8 bound to GST-JCF1(RBD) was analyzed by Western blotting with Rab8 antibody. (Lower panel) The intensity of bands was quantified by ImageJ software. The amount of GTP-Rab8 was normalized to the control level. The bar graph represents mean  $\pm$  SD ( $n = 3$  experiments).  $*P < 0.05$ , Student's  $t$ -test.

Source data are available online for this figure.
